# Supplementary material for: Preparation of phase-pure MgTiO3 microwave dielectric ceramics for GPS antenna application
Source: Royal Society of Chemistry journal article supplement (doi:10.1039/d4tc02724h), 2024-01-01
Supplement: d4tc02724h1.pdf [file d4tc02724h1.pdf]

## Supporting Information File

### Preparation of Phase Pure MgTiO<sub>3</sub> Microwave Dielectric Ceramic for GPS antenna

#### Application

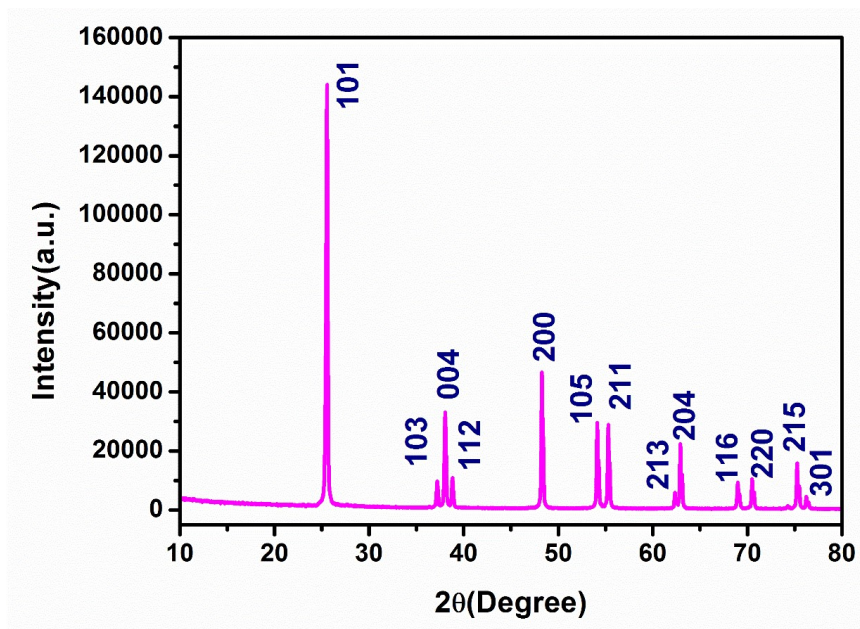

Fig. S 1 XRD of raw TiO<sub>2</sub> powder

Table S1 Designed dimensions of MPA

| Parameters                          | Dimensions (mm) |
|-------------------------------------|-----------------|
| Length of Substrate, L <sub>s</sub> | 40.50           |
| Width of Substrate, W <sub>s</sub>  | 40.50           |
| Height of Substrate, H              | 2.1             |
| Length of Patch, L <sub>p</sub>     | 21.62           |
| Width of Patch, W <sub>p</sub>      | 30.90           |
| Height of Patch, H <sub>p</sub>     | 0.03            |
| Width of Feedline, W <sub>f</sub>   | 2.03            |

**Table S2** Optimized results of simulated MPA

**Results:**

|                          |          |
|--------------------------|----------|
| Frequency (GHz)          | 1.572    |
| $S_{11}$ (dB)            | -23.7326 |
| VSWR                     | 1.139    |
| Bandwidth (MHz)          | 10.3     |
| Directivity              | 3.316    |
| Gain (dBi)               | 1.543    |
| Impedance ( $\Omega$ )   | 50.73    |
| Radiation Efficiency (%) | 66.48    |

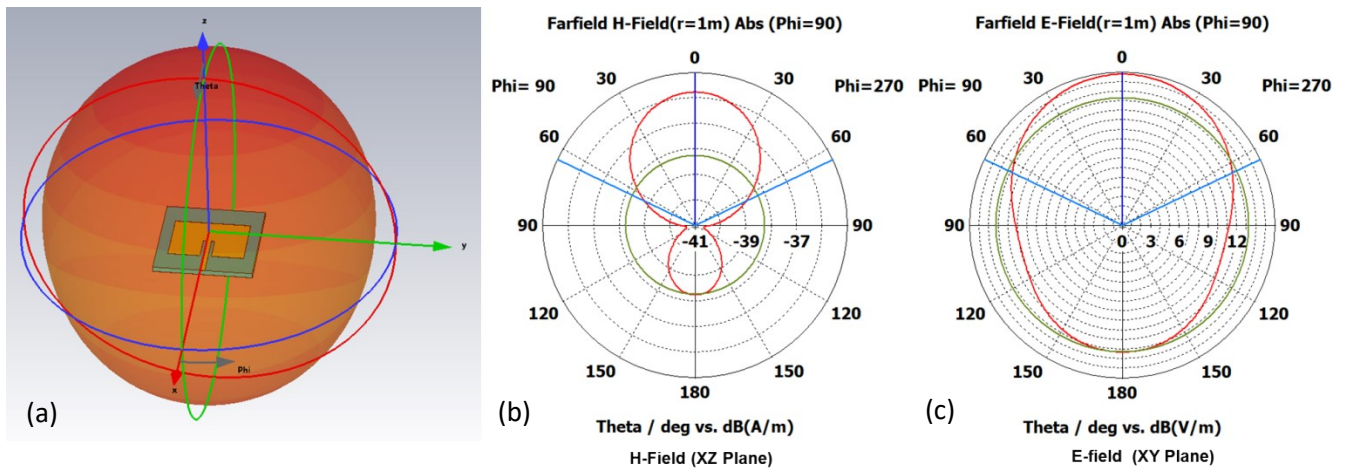

**Fig. S 2** Far fields of Simulated MPA (a) 3D radiation pattern, (b) (c) 1D radiation of E-field and H-field

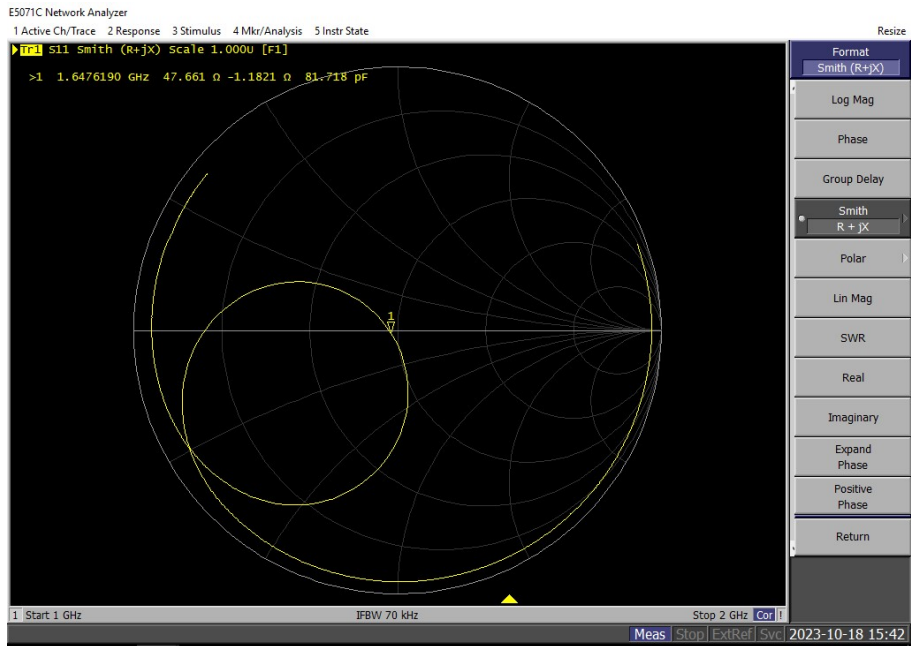

**Fig. S 3** Impedance measurement results from Smith chart.

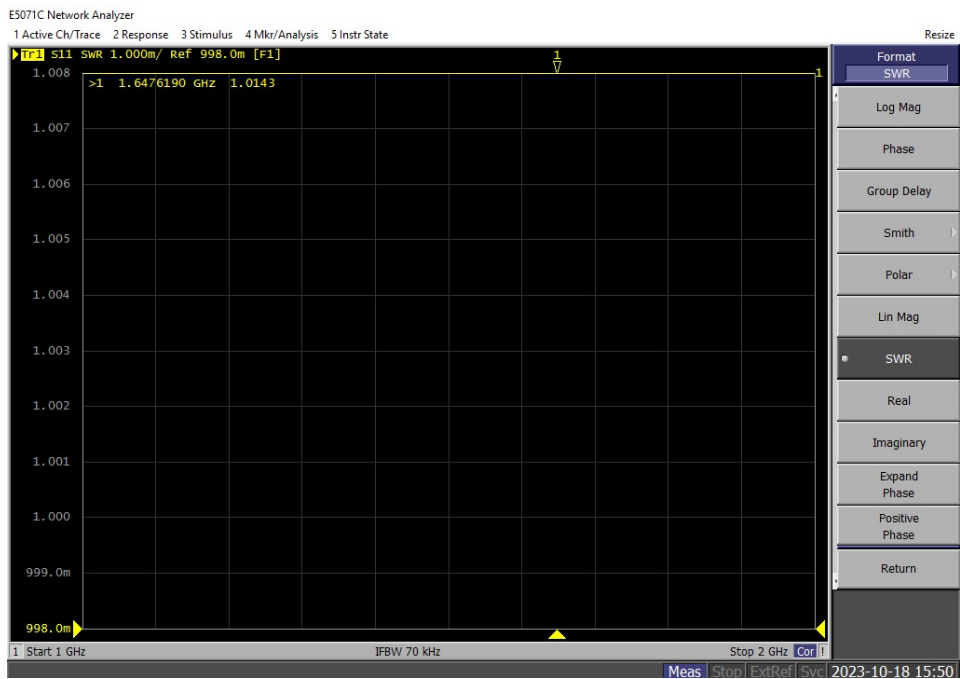

**Fig. S 4** VSWR measurement results.
